# Supplementary material for: Gene Expression and Functional Annotation of the Human Ciliary Body Epithelia
Source: PLoS One. 2012 Sep 18;7(9):e44973. doi: 10.1371/journal.pone.0044973 (PMC3445623; doi:10.1371/journal.pone.0044973)
Supplement: Table S7 — Molecular networks. (XLS) [file pone.0044973.s049.xls]

## Sheet: Sheet0
ID	Molecules in Network	Score	Focus Molecules	Top Functions
1	ANO6,ARL16,BEX4,C10orf32,C1orf27,C1orf31,C1orf43,C5orf15,C7orf41,CHID1,CRLS1,CYSTM1,EFHA1,FAM210B,FOPNL,GPX8,IQCA1,JAGN1,KLHDC8B,LRRC42,LYRM2,MARVELD1,MARVELD2,METTL5,MFF,NEMF,PM20D2,PTAR1,RNASEH2C,SLC35E4,TMEM64,TRMT5,UBC,WDR45L,ZNF430	44	35	Hematological Disease, Hereditary Disorder, Neurological Disease
2	ABI3BP,COX6A1,CUTA,Cytoplasmic Dynein,DCTN2,DYNC1I2,DYNC1LI2,Dynein,DYNLT3,ECI2,EIF6,EIF3C/EIF3CL,EIF3D,EIF3E,EIF3H,EIF3K,EIF3L,FOLR1,GPBP1L1,GRB2,HCN2,HMGN3,IK,MRPS6,NPEPPS,OSBPL1A,PAFAH1B1,PHACTR2,RNF10,SNX5,SNX12,SYNGR2,TALDO1,WDR1,ZFP106	39	33	Gene Expression, Protein Synthesis, Cell Cycle
3	BRP44,CCNDBP1,CGNL1,CSDE1,ENaC,IMP3,MRPS9 (includes EG:301371),NEDD8,p85 (pik3r),PAFAH1B2,PPM1A,RPL5,RPL6,RPL7,RPL8,RPL9,RPL12,RPL13,RPL17,RPL18,RPL21,RPL23,RPL24,RPL26,RPL28,RPL30,RPL31,RPL10A,RPL29 (includes EG:367874),RPL7A,RPLP0,RPLP1,SYF2 (includes EG:170933),TMEM230,WNK1	39	33	Cancer, Hematological Disease, RNA Post-Transcriptional Modification
4	ACTB,Alpha tubulin,Beta Tubulin,CACYBP,CCT3,CCT4,CCT7,CCT8,CCT6A,CHN1,CKB,CNP,COLEC12,CSDA (includes EG:56449),DPYSL2,DSP,FBXO25,FNTA,ISYNA1,ITGAM (includes EG:16409),LATS2,MAP7D1,MT3,PFDN2,PFDN4,PGM1,PPP2CA,PSMA3,S100A6,S100B,SAV1,TCP1,TUBA1C,TUBB,TUBB4B	39	33	Cell Death, Cell Morphology, Cellular Assembly and Organization
5	AFTPH,AMFR,C21orf33,CTSF,EAPP,EID1,EPDR1,ERLIN2,FCGRT,HERPUD1,HSPA13,KIAA1797,MAGEF1,NAGLU,NDNL2,NFKBIA,NINJ1,NSMCE1,PCDH7,POLE4,RNF13,RNF114,RWDD3,SBDS,Scf Trcp beta,SEMA3C,SNURF,SPOCK1,Ube3,UBE2D3,UBE3A,UBE4A,UBE4B,UBQLN2,UFD1L	39	33	Post-Translational Modification, Protein Degradation, Protein Synthesis
6	ACAA1,ARPC1A,ATP6AP2,BEX2,C4,C4orf27,CASP4,CCDC47,FUCA1,HIGD1A,IBTK,IGBP1,ITM2C,JKAMP,NFkB (complex),PAM,PDCD5,PPARα-RXRα,PTPLAD1,RNF5,RNF7,RNF141,SELK,SSR4,STT3A,SURF4,TMBIM4,TMCO1,TMEM14C,UHMK1,WSB1,WTAP,ZFAND5,ZFAND6,ZNF675	37	32	Developmental Disorder, Hereditary Disorder, Neurological Disease
7	Ap1,APOA1BP,ARL5A,ASS1,CBX1,CBX3,CHRDL1,COL9A1,COL9A2,COL9A3,CYP1B1,DNTTIP2,glutathione transferase,GSTM3,GSTO1,GSTP1,H2AFX,HIST1H3A (includes others),HIST1H4A (includes others),IDH1,LPL,MAT2A,MAT2B,MT2A,MVP,NACA,NR2F1,SAT1,SIDT2,SLC23A2,SLC39A8,SP3,STAT1/3/5 dimer,YY1,ZHX1	37	32	Lipid Metabolism, Small Molecule Biochemistry, Carbohydrate Metabolism
8	CAPRIN1,DGUOK,DHX36,DNAH3,Eif2,FAU,NARS,PARVA,PNISR,PXN,Ribosomal 40s subunit,Rnr,RPS2,RPS5,RPS7,RPS8,RPS10,RPS11,RPS12,RPS13,RPS15,RPS18,RPS20,RPS21,RPS23,RPS24,RPS26,RPS27,RPS29,RPS15A,RPS17/RPS17L,RPS27A,RPS27L,SRSF3,TM7SF2	36	32	RNA Post-Transcriptional Modification, Infectious Disease, Cancer
9	60S ribosomal subunit,Arnt-Hif1a,CERS2,EBP,EMP1,EMP2,EPM2AIP1,FNDC3A,FOXP1,IFRD1,KIF21A,MAML1,MEIS2,MT1G,OPTC,PHF2,PPAP2A,PPAP2B,RPL15,RPL22,RPL34,RPL37,RPL41,RPL22L1,RPL26L1,RPL36A,RPL36AL,RPL37A,RPL39 (includes EG:25347),SLC19A2,SLC20A1,SSBP4,Vegf,ZNF24,ZNHIT3	35	32	Cancer, Reproductive System Disease, Carbohydrate Metabolism
10	APCDD1,ATF4,CCNH,CDO1,CEBPB (includes EG:1051),Ck2,CKS1B,CLPP,DSPP,EPB41L4B,FGFR1,FGFR2,GADD45B,GANAB,GHITM,GULP1,HMGN1,HSD17B12,IER2,JUND,LRRC8A,MAEA,NR3C1,PEPD,RNA polymerase II,RPL13A,SAA,SFRP1,SLC38A1,SPP1 (includes EG:20750),SQRDL,TIMP3,TM2D3,TMEM50B,ZKSCAN1	35	32	Organismal Development, Tissue Development, Cellular Development
11	ACTR6,adenylate kinase,AK2,AK4,BNIP3,BNIP3L,BRP44L,C11orf75,CHKA,EGFR/PDGFR/IGFR,FAM129B,GABARAP,GABARAPL1,GABARAPL2,GLRX5,HADHB,KEAP1,KXD1 (includes EG:39425),LTBP2,MAP1LC3B,MRFAP1,NEK9,Ntrk1 dimer,NUPR1,PI3K (complex),PMEL,PPHLN1,SHFM1,SQSTM1,TBC1D14,TKT,TMEM11,ULK1,ZNF207,ZNHIT1	35	31	Cell Morphology, Cellular Function and Maintenance, Connective Tissue Development and Function
12	adenosine-tetraphosphatase,AHNAK,ATP5B,ATP5C1,ATP5D,ATP5E,ATP5F1,ATP5G1,ATP5G2,ATP5H,ATP5I,ATP5J2,ATP5L,ATP5O,ATP6AP1,ATP6V0B,ATP6V0C,ATP6V0D1,ATP6V0E1,ATP6V1C1,ATP6V1D (includes EG:299159),ATP6V1H,CALU,H+-exporting ATPase,H+-transporting two-sector ATPase,IGF1R,IVNS1ABP,MYOF,RAB18,RBM3,RRAGA,RRAGC,TMBIM6,Vacuolar H+ ATPase,ZFP36L2	35	31	Energy Production, Nucleic Acid Metabolism, Small Molecule Biochemistry
13	ANAPC5,ANAPC11,ANAPC13,BMI1,C17orf79,CDC26 (includes EG:246184),COPS3,COPS4,DUB,E3 RING,FBXL3,FBXO7,FBXO21,IL-2R,IMMT,KCTD6,MINOS1,NDUFB9,PHC2,SDF4,SKP1/SKP1P2,STAT,SUGT1,TCEAL2,TCEAL4,TCEB1,TMEM70,UCHL1,USP4,USP11,USP16,USP39,USP48,USP53,WSB2	35	31	Post-Translational Modification, Connective Tissue Development and Function, Embryonic Development
14	ANKRD12,CBS,CSRP2,ECHDC2,EEF1A1,EEF1D,FAM63A,HBXIP,HNRNPC,Interferon alpha,LSM7,LSM14A,LSM3 (includes EG:27258),LSM4 (includes EG:25804),LSM5 (includes EG:23658),NAA38,Pka catalytic subunit,POP7 (includes EG:100004610),PRPF8,RPS16,RPS25,RPS3A,SMN1/SMN2,SNRNP70,snRNP,SNRPB2,SNRPD1,SNRPD2,SNRPE,SNRPF,SNRPN,SNW1,STRAP,Trk Receptor,TXNL4A	35	31	RNA Post-Transcriptional Modification, Cellular Assembly and Organization, Infectious Disease
15	BBX,BRAT1,C20orf3,CCNI,Collagen type I,COTL1,CXXC5,estrogen receptor,FAM189B,GTF2I,HP1BP3,Iga,IL13RA1,KRT8,KRT10,KRT18,LGALS3,NIPAL3,NME2,Pdgf (complex),PEX19,PHF10,RBMS1,RPL38 (includes EG:3355144),SLC15A4,SMAD2,SMAD3,SMARCA4,SMARCC2,SUMO2,SUZ12,UROD,VCL,VIM,ZMIZ1	35	31	Cell-To-Cell Signaling and Interaction, Hepatic System Development and Function, Liver Adhesion
16	ANP32E,Apoptosome,ARL6IP4,CRABP1,FEZ2,FIP1L1,FOS,GAS5 (includes EG:14455),GTF2IRD1,HNRNPH1,HNRNPH2,KHSRP,Lamin,LMNA,MT1A,NAE1,NBPF11 (includes others),NUP107,ornithine decarboxylase,PKP2 (includes EG:287925),Rab5,SCYL1,SELENBP1,SERBP1,SNN,SNX3,SUN1,SYNE1,TBCA,TIPARP,TMSB4,TMSB10/TMSB4X,TPR,TSPYL4,WWC1	33	30	Cellular Development, Cellular Growth and Proliferation, Renal Proliferation
17	aldehyde dehydrogenase (NAD),ALDH,ALDH1A1,ALDH1A3,ALDH4A1,ALDH6A1,ALDH9A1,CCL2,CYTB (includes EG:140512),Cytochrome bc1,ICT1 (includes EG:100149182),MALSU1,MRPL18,MRPL45,MRPL46,MRPL47,MRPL54,MRPL55,MRPL22 (includes EG:100142645),MRPL27 (includes EG:287635),MRPL51 (includes EG:297601),MRPS24,MRPS25,MRPS28 (includes EG:28957),NDUFS1,RNASE1,RNase A,RNH1,TUFM,ubiquinol-cytochrome-c reductase,UQCRC1,U…	33	30	Embryonic Development, Tissue Morphology, Organ Development
18	AIP,Ant,AP-3,AP3D1,AP3S2,ARIH2,CCDC53,CKAP4,CNPY2,EEF1B2,EEF1G,EML4,Focal adhesion kinase,GOT2,GOT,LUC7L2,Mrlc,PALLD,PTN,SLC25A3,SLC25A6,SLC25A36,SRPR,THOC7,TIMM9,TIMM13,TIMM17A,TIMM8B,TOMM7,TOMM20,TYR,UACA,VDAC2,WIPI2,ZFYVE21	33	30	Protein Trafficking, Amino Acid Metabolism, Post-Translational Modification
19	ABI-2-CYFIP2-HSPC300-NCKAP1-WAVE,ARL3,ARL2BP,Arp2/3,BRK1,C14orf166,C22orf28,CCDC104,CLIP1,CRELD2,CYFIP2,DDX1,DDX3X,DEXI,EIF1,EIF5,eIF,EIF1AX,EIF1AY,FBXO33,FXR1,GOLGA4,HNRNPU,IQGAP,NONO,OCRL,PURA,PURB,RAB14,RAB35,RAC1,STAU1,TBCD,WASF2,Wave	32	30	Protein Synthesis, Cellular Assembly and Organization, Cell Morphology
20	B4GALT1,C16orf45,ENO2,Ephb,Grb2-Shc1-Sos,NADH Dehydrogenase,NADH2 dehydrogenase,NADH2 dehydrogenase (ubiquinone),ND2 (includes EG:140532),ND3 (includes EG:140533),NDUFA2,NDUFA4,NDUFA6,NDUFA7,NDUFA8,NDUFA11,NDUFA12,NDUFB1,NDUFB2,NDUFB3,NDUFB4,NDUFB7,NDUFB10,NDUFB11,NDUFC1,NDUFC2,NDUFS4,NDUFS7,NDUFV2,NDUFV3,PMEPA1,RAB3IP,RAPGEF2,Ras,UXT	31	29	Hereditary Disorder, Metabolic Disease, Cardiovascular Disease
21	AES,BTF3,DPM1 (includes EG:13480),EDF1,GPBP1,Gsk3,GTF2A2,GTF2F2,Holo RNA polymerase II,HPRT1,HTATSF1,I kappa b kinase,MRPS18B,phosphatase,POLR2F,POLR2H,POLR2I,POLR2J,POLR2J2/POLR2J3,POLR2K,POLR2L,RDBP,RPL36,RPL18A,RPL27A,SIX6,SPCS2,SSB,ST13,SUPT4H1,TAF7,Taf,TFIIE,TNFRSF14,TROVE2	31	29	Gene Expression, Infectious Disease, Embryonic Development
22	3-hydroxyacyl-CoA dehydrogenase,ADH5 (includes EG:11532),AKR1A1,alcohol dehydrogenase,APP,CFL2,CLIC1,COX11,COX17 (includes EG:10063),COX6B1,COX6C,COX7A1,COX7A2L,COX7C,cytochrome-c oxidase,DBI,ENAH,FIS1 (includes EG:288584),HADH,HSD17B10,ITM2A,LDHB,MUT,PABPN1,PGAM1,PQLC1,QDPR,SCG5,Soat,SUCLG1,TARDBP,TBC1D1,THSD4,TM2D1,TPI1	30	31	Metabolic Disease, Cellular Assembly and Organization, Cell Death
23	ATP synthase,BTG2,CDK2-CyclinE,CDKN1C,COX1 (includes EG:140539),COX4I1,COX5A (includes EG:12858),COX5B (includes EG:100002384),CTNNB1,CXADR,CYB5R3,Cyclin D,Cyclin E,CYP51A1,DAD1 (includes EG:13135),DUT,ESRRA,FAM102A,FBRS,GALM,GAPDH,GBE1,HNRNPK,HSPD1,IDI1,MCL1,MT1L,NDUFA5,PCBP1,PCBP4,PELP1,RBM5,SEPW1,STARD7,WWOX	30	31	Cancer, Digestive System Development and Function, Organ Morphology
24	AKIRIN2,Ap2 alpha,ASPH (includes EG:312981),ATP1A2,ATP1B1,ATP1B2,ATP1B3,BLOC1S2,CCDC6,CIB1,DUSP3,ERK1/2,FSTL1,ITPR,LETMD1,MPZL1,Na-k-atpase,OSBPL9,PEBP4,Presenilin,RABAC1,RASD1,REEP5,RHEB,Ryr,Secretase gamma,SGK1,SLC34A2,SPG21,TMEM109,TMEM184C,TRDN,TRIM2,VAPA,ZFYVE27	29	28	Molecular Transport, Neurological Disease, Connective Tissue Disorders
25	AMOTL2,ATP2B4,C20orf11,Calcineurin A,CASK,ERK,FKBP3,FKBP9,GNG11,GUK1,Guk,HNRPDL,KIR,MAL,MKNK2,MPP1,NRXN3,PEBP1,peptidylprolyl isomerase,Pmca,PPIA,PPIB,PPIL3,PTP4A2,PTRF,RABGGTB,RANBP9,RNF103,RNF150,S100,SLU7 (includes EG:10569),SPINT2,TNPO1,UBE2Z,ZNF148	29	28	Cell Death, Drug Metabolism, Small Molecule Biochemistry
