# Supplementary material for: Gene Expression and Functional Annotation of the Human Ciliary Body Epithelia
Source: PLoS One. 2012 Sep 18;7(9):e44973. doi: 10.1371/journal.pone.0044973 (PMC3445623; doi:10.1371/journal.pone.0044973)
Supplement: Table S13 — Functional molecular networks different between NPE and PE. (XLS) [file pone.0044973.s055.xls]

## Sheet: Sheet0
ID	Molecules in Network	Score	Focus Molecules	Top Functions
1	AMPH,Ap2 alpha,AQP11,BICD2,CCDC24,CCDC88B,DISC1,DOK6,DST,Dynamin,DYNC1I1,EGFR,Endophilin,GPM6B,growth factor receptor,Hla-abc,KATNAL1,KIF5A,KIF5B,LRIG1,LRRFIP1,NFIB,OLFM1,PLEKHA5,PLEKHA6,PPP1R13B,REPS2,SH3D19,SH3GL2,SH3GL3,SH3KBP1,SPARCL1,TRAF3IP1,TRAK1,TRAK2	39	30	Cellular Assembly and Organization, Cellular Function and Maintenance, Cell Death
2	ABLIM3,ADCY7,ASPG,CAK,CD48,CLN5,CRTAM,CYB561,CYP4A,Ferritin,GPNMB,HAVCR2,HCP5,HEPH,HLA-DQ,HMG CoA synthase,HMGCS1,HMGCS2,IFNG (includes EG:15978),Inhibin,KLRB1,LGALS9,LIX1,MLANA,NFE2L3,PHACTR1,PLA2G5,PLA2G7,SIGLEC1,SLC12A1,SLC40A1,SOAT1,TMEM158,TPP1 (includes EG:1200),TRPM4	37	29	Cell-To-Cell Signaling and Interaction, Inflammatory Response, Carbohydrate Metabolism
3	Adaptor protein 2,ADRA2A,Beta Arrestin,CELSR1,CELSR2,Clathrin,EDNRB,EGFR ligand,FZD4,FZD7,FZD10,GNG2,Gpcr,GPER,GPR4,GPR19,GPR37,GPR85,GPR98,GPR124,GPR180,GPR137B,GPRC5A,GRM1,GRM8,HTR2C,LGR4,LPAR3,Metalloprotease,NMUR1,P2RY6,PLVAP,QRFPR,Relaxin,SSTR2	35	28	Carbohydrate Metabolism, Molecular Transport, Small Molecule Biochemistry
4	BAMBI,Cytokeratin,DFNA5,EXT2,FMOD,FXYD6,GDPD5,IL11RA,MCF2L2,MIA3,OAT,PCOLCE2 (includes EG:26577),Pdgf Ab,PDGF-AA,PDGF-CC,plasminogen activator,PMEPA1,RNF130,RNF152,ROR1,SIX6,SLC23A2,SLC35A1,SLC39A8,SLIT3,Smad,SUSD5,TGF-β/NODAL,TGFB1 (includes EG:21803),Timp,TLE4,TLL1,TRIM9,TTLL3,XYLT1	33	27	Carbohydrate Metabolism, Molecular Transport, Small Molecule Biochemistry
5	B3GAT1,BTC,CCDC88A,cyclooxygenase,EFHC2,EMCN,Erbb1 dimer,ERK1/2,FAM132A,FGFR2,GALNT2,GALNT6,GALNT10,GALNTL4,GDA,HS6ST2,IL17RD,KBTBD11,KCNN1,KCNN3,LGI1,MMD,Mucin,NOG,NTF3,Pkg,polypeptide N-acetylgalactosaminyltransferase,potassium channel,PVRL1,SLC5A6,SMAD1/5,Smad1/5/8,SOSTDC1,TMEFF2,TMEM176B	31	26	Post-Translational Modification, Hair and Skin Development and Function, Nervous System Development and Function
6	7S NGF,ADAMTS5,ADAMTS12,AEBP1,Alpha catenin,ASIC1,Cadherin,CDH6,CDH11,COL13A1,COL15A1,COMP,CTNNA2,CTNND2,Ecm,ECM1 (includes EG:100332249),GBA,HPGD,HTRA1,Igf,IGFBP4,IGFBP5,IGFBP7,Igfbp,Mapk,MMP11,MMP15,NEO1,PDZD2,PKP4,PTPRM,Serine Protease,Tenascin,UGGT1,WISP1	31	26	Connective Tissue Disorders, Cellular Movement, Skeletal and Muscular System Development and Function
7	B4GALT1,CD3D,CDK11A/CDK11B,CGNL1,chymotrypsin,CRYBB2,CYP26B1,DERL1,ENaC,FGFR3,Gm-csf,HBZ,LRAT,LRMP,MAF,Na+,K+ -ATPase,NEDD4L,NUAK1,ORAI1,PI3K p85,Pki,RAP1GAP2,Ras,RASGRP3,RBP7,Rbp,SCN8A,SCNN1B,SLC35G1,SSFA2,ST6GAL1,STAT5a/b,STRA6,TFPI2,WNK1	31	26	Molecular Transport, Cellular Function and Maintenance, Cardiovascular Disease
8	ABCB1,ABCC1,ADRB,amylase,ATP1B1,ATPase,Cathepsin,CRAT,CTSB,DIO2,ELF4,ENTPD1,GRHL2,GTPASE,KIF3B,LMO2,Mmp,MYH7,NLRP3,NT5E,PBX3,PKNOX1,PNN,Proinsulin,RAB3A,RALBP1,RHOBTB3,SLC16A2,SLC27A1,SPINK2,TAP1,Tni,trypsin,VAMP8,ZEB1	31	26	Nucleic Acid Metabolism, Small Molecule Biochemistry, DNA Replication, Recombination, and Repair
9	AGA,AHR,Alp,ANP32B,APLF,CALCA,CCND1,CD3,CDKN1B,CDKN2A,CHRDL2,Ck2,CTNNB1,E2F8,EMILIN2,FAM126A,GLDC,GOLGB1,Insulin,LCP1,MPEG1,Nos,ORAI2,PCDH8,PCDH9,PCDHA11,PLEKHA8,PRPH,QPCT,RMI2,SLC1A4,SMPX,TCR,TSPAN9,Tubulin	31	28	Cell Cycle, Hair and Skin Development and Function, Cancer
10	BNC1,c-Src,CGN,CNKSR3,CPE (includes EG:12876),CPEB1,DIAPH2,DUOX1,EMP2,ERBB,FLNB,GAS1 (includes EG:14451),Gli,GPC5,Hedgehog,HEXIM1,HHAT,IL27RA,ITGA6,JAM,KLK2,LAMA4,LPHN2,MSRA,NID2,Patched,PRRX1,PRRX2,SERPINF2,SERPINF,SOD3,TMSB4,TMSB10/TMSB4X,Vegf,VEGFC	30	26	Tissue Morphology, Embryonic Development, Organismal Development
11	BCL11A,Bcl9-Cbp/p300-Ctnnb1-Lef/Tcf,CARD10,CDH22,CITED4,DCT,DOK3,GNGT1,Groucho,IRX5,KCND2,KCND3,LINGO1,MITF-p300/CBP,MLKL,MYO1E,NFkB (complex),peptidase,PKC(β,θ),PPARα-RXRα,PSD3,RAB3C (includes EG:115827),RIPK4,SHIP,SLC12A4,SLC12A7,SLC22A4,TCDD-AHR,TCF4,TCF/LEF,TFEC,TNFRSF19,TRIM6,TYR,TYRP1	29	25	Cellular Function and Maintenance, Hair and Skin Development and Function, Amino Acid Metabolism
12	ABCC4 (includes EG:10257),ABCG2,AFAP1L2,CAPG,CD53,CD63,CD276,CLRN1,CPD,Erm,FBLIM1,Fgfr,Gap,IGF2BP3,Integrin,Integrin alpha 3 beta 1,Integrin alpha 4 beta 1,MCAM,OSTalpha,PI3K (complex),POSTN,PRAP1,PTGFRN,Ptk,RHOV,RPS6KA,SLC39A14,SLC3A2,SLC4A2,SLC7A5,SLC7A7,SLC7A8,SLC9A1,SLC9A3R1,TGFBR	29	25	Amino Acid Metabolism, Molecular Transport, Small Molecule Biochemistry
13	AAK1,ACVR1C,ARHGAP35,CNTN1,Collagen type IV,DNM3,ELK3,ERK,ETS,GATA6,GDF11,gelatinase,HERP,HES5,HEY1,HEY2,HOMER1,Homer,LAMB1,Laminin1,MAPK4,mGluR,NOTCH2,Notch,PDGFC,PLCL1,PLCL2,PTPRK,RGS5,SDC3,Secretase gamma,SMOOTH MUSCLE ACTIN,THBS4,TRIB1,WFIKKN2	27	24	Connective Tissue Development and Function, Skeletal and Muscular System Development and Function, Cardiovascular Disease
14	ADCY9,ATP2B3,Calcineurin A,Calcineurin protein(s),Calmodulin,CAMK1D,CASK,CD24,CD34,CK1,CPNE5,DOC2B,EPB41L2,Frizzled,FRZB,Gata,Guk,MPP3,MPP6 (includes EG:35343),MSX1,MYO1B,PLK2,Pmca,PPFIA3,PTPRG,Ral,SIPA1L1,SLC4A4,SOX8,SOX11,Sox,TPR,WIF1,Wnt,WNT2B	27	24	Connective Tissue Development and Function, Embryonic Development, Organ Development
15	ABCA1,ACTG2,ANKS4B,BACE2,CADPS,calpain,caspase,Cg,Cytochrome c,DLX3,DTL,EFHD1,FAM198B,Filamin,FSH,hCG,KRT18,LFNG,LGALS3,Lh,MDK,NFYC,NOS1,PCYT1B,Pdgfr,PDLIM3,POU5F1,Pro-inflammatory Cytokine,PSEN1,PTGS2,SCN4B,SHOX2,SP1,Spectrin,SYT13	26	24	Connective Tissue Development and Function, Embryonic Development, Nervous System Development and Function
16	ADTRP,AKAP13,BCL2L2,CD200,Ctbp,DAB2IP,DLG2,DUSP16,EPHB1,EPHB2,Ephb,Ephb dimer,F10,FOXP2,GRIN2C,GRIN3A,Il8r,Jnk,KAL1,KALRN,KLHL2,LY96 (includes EG:17087),ME1,MECOM,NCK,NfkB1-RelA,NMDA Receptor,phosphatase,RCAN2,RHOU,SDC2,SDK2,SFTPC,T3-TR-RXR,WNT5B	26	25	Cell Morphology, Cellular Assembly and Organization, Cellular Development
17	ARHGAP20,ATP6AP1,ATP6V1C2,CA4,CASP12,Caspase 3/7,CLSTN1,DKK3,Fgf,GNA14,GUCY1A2,Hspg,Igm,LAMB4,Mek,MTORC1,PAWR,PDIA3,PLA2,PLA2G4A,PLC,PPT1,Presenilin,PRNP,Rap1,RAPGEF4,RASSF2,RASSF3,SH3PXD2A,SORL1,SVIL,TMBIM6,TNFAIP1,tyrosine kinase,Vacuolar H+ ATPase	26	23	Cellular Compromise, Hereditary Disorder, Neurological Disease
18	AKAP12,AQP4,ARRB1,BCMO1,Cbp/p300,CCDC80,CCPG1,CEBPA,CHD7,CTNNβ-LEF1,Hat,HDAC9,HISTONE,Histone h4,Importin alpha,LEF1,MSX2,NRP1 (includes EG:18186),Nuclear factor 1,PCBD2,PEPCK,PLXND1,PML,PPARG,ROBO1,SRGAP1,SWI-SNF,TGFB2,TGFB3,thymidine kinase,TPM2,TPM1 (includes EG:22003),TRPV4,VitaminD3-VDR-RXR,ZDHHC2	25	24	Cellular Development, Connective Tissue Development and Function, Embryonic Development
19	Adaptor protein 1,AP1S3,AXL,CD2,CD69,Dgk,DGKD,DGKE,ETV5,HLA-DR,Ifn,IFN ALPHA RECEPTOR,IFN alpha/beta,IFN Beta,Ifnar,IGSF21,IL12 (complex),IL12 (family),Il12 receptor,JAK,MBOAT2,MERTK,NREP,NXN,PRDM16,RAMP1,RASL12,RRAD,SERPINB9,SLC16A6,SLC31A2,STAT4,TLR3,TLR2/3/4,TULP1	24	22	Cell-To-Cell Signaling and Interaction, Inflammatory Response, Cellular Function and Maintenance
20	A2M,Ap1,APOE,atypical protein kinase C,C1QTNF5,CAV1,CES1,CMTM4,COBLL1,DCBLD2,DOCK4,ELOVL3,F7,Fibrinogen,FMO1 (includes EG:14261),Gsk3,HPN,LDL,LEPRE1,LRP,NFAT (complex),NPTX1,OSBP,Pdgf (complex),PDGF BB,Pld,PRSS35,S1PR1,SLC2A4,SLC7A2,SORBS1,Sos,SPHK1,TNFRSF14,VAV	24	23	Lipid Metabolism, Molecular Transport, Small Molecule Biochemistry
21	ACP5,ANTXR1,C11orf63,CCNA2,Creb,CTNNβ-TCF/LEF,DBI,DIRAS1,Fcer1,GJA1,HADHB,Histone h3,IKK (complex),IPO5,KDM2B,KITLG,KRT8,MED12L,mediator,MST1R,NAV2,NEDD4,Nfat (family),NKD1,PRKCB,Raf,RASGEF1A,RNA polymerase II,RPS6KA3,SDSL,Sod,SPOCD1,TCEAL2,TM4SF18,TRIM44	23	25	Skeletal and Muscular System Development and Function, Organ Morphology, Reproductive System Development and Function
22	3',5'-cyclic-nucleotide phosphodiesterase,ABCC9,ADCY2,ATP2B4,CTTNBP2,FAM40B,G protein alpha,GNAO1,KCNJ3,KCNJ8,Kcnj,KCNQ1,MHC Class II (complex),MIR124,NTS,Pde4,Pde,PDE1/2/4,PDE11A,PDE1A,PDE1C,PDE4D,PDE6B,phosphoinositide phospholipase C,Pka,PLCB1,PLCD3,PLCE1,PRKAC,pyruvate kinase,RAB13,Rap,STK24,STRN,TSH	22	21	Cell Signaling, DNA Replication, Recombination, and Repair, Nucleic Acid Metabolism
23	ABL1,ADCY,AGT,ARHGAP17,ATF7,CABLES1,CLDN7,CRYM,CYP4F12,EGF (includes EG:13645),G protein beta gamma,G-protein beta,G-protein gamma,Gi-coupled receptor,GNG11,GRP,Hdac,IRX3,MYH10,NCALD,NETO2,NRG (family),NTRK3,p70 S6k,PRCP,PRSS23,PTPN11,Sfk,Shc,STAT,TMEM74B,TPK1,Trk Receptor,TSHZ3,unspecific monooxygenase	22	22	Carbohydrate Metabolism, Small Molecule Biochemistry, Cellular Assembly and Organization
24	APC2 (includes EG:10297),BMP,COL1A2,Collagen Alpha1,Collagen type III,COX7A1,cytochrome-c oxidase,Eotaxin,FLI1,FST,FSTL1,GSC,HEYL,KL,LDL-cholesterol,LTBP1,MEF2,MKX,MOGAT2,MYCBP2,MYH11,P38 MAPK,RUNX3,SMAD1,SMAD7,SMAD9,Smad2/3,Smad2/3-Smad4,Tgf beta,TGFBI,TIMP2 (includes EG:21858),TINAGL1,VLDL-cholesterol,ZEB2,ZSCAN4	21	23	Cellular Movement, Cell Morphology, Embryonic Development
25	14-3-3,20s proteasome,26s Proteasome,Alpha tubulin,Beta Tubulin,BST2,CCDC14,CYTL1,Dynein,FBXO32,GOT,GZMA,Hd-perinuclear inclusions,HIP1 (includes EG:176224),HIPK2,Hsp27,Hsp70,Hsp90,IFT57,IGF1,MARK1,PCSK5,PCSK6,PFK,RAB8B,Rsk,Sapk,SNCA,SNCG,SPR (includes EG:20751),TTLL7,TUBB6,UACA,Ubiquitin,UCHL1	20	20	Carbohydrate Metabolism, Small Molecule Biochemistry, Neurological Disease
